1 **Original Article**

2 **Bioinformatical enrichment analysis of genes involved in the pathway**  
3 **of endometriosis disease**

4 **Kusum Kusum<sup>1\*</sup>, Ashish Ashish<sup>2\*</sup>, Ravi Bhushan<sup>3</sup>, Radha Chaube<sup>1</sup>, Sangeeta Rai<sup>4</sup>, Royana**  
5 **Singh<sup>2\*</sup>**

6 **\*The First Two Authors Have Equal Contribution**

7 <sup>1</sup> Department of Zoology, Institute of Science, Banaras Hindu University, Varanasi-221005 Uttar  
8 Pradesh, India.

9 <sup>2</sup> MRU Lab, Department of Anatomy, Institute of Medical Science, Banaras Hindu University,  
10 Varanasi, 221005, Uttar Pradesh, India.

11 <sup>3</sup> Department of Chromosomal Genetics Disorder Institute of Science, Banaras Hindu University,  
12 Varanasi-221005 Pradesh, India.

13 <sup>4</sup> obstetrics and gynecology, Institute of Medical Science, Banaras Hindu University Varanasi-  
14 221005 Pradesh, India.

15 Corresponding Author  
16 royanasingh@bhu.ac.in

17 **Keywords:** Endometriosis, mRNA seq analysis, reproductive women, estrogen, aromatase

18 **Abstract**

19 Endometriosis, is a gynecological disease, where uterine (eutopic) endometrial glands and tissues  
20 are present outside the intra-uterine locations, ectopic regions (pelvic peritoneum, fallopian tubes or  
21 ovaries). About 5-10% reproductive and 20-50% infertile women have endometriosis. Several  
22 factors like hormonal, environmental, genetic and immune system are involved in the pathogenesis  
23 of endometriosis both directly or indirectly altering the estrogen level and thus affecting the  
24 reproductive health of women. Current study was done with an aim to identify novel and potential  
25 biomarker for endometriosis using mRNA seq analysis. From raw gene expression profiles  
26 differentially expressed genes (DEGs) were identified and further their functional analysis was  
27 conducted. A total of 552 (312 up and 240 downregulated) DEG's were identified in samples from  
28 endometriosis suffering women when compared with control subjects. Major DEGs forming  
29 hubnodes like C3, PSAP, APP, GNG12 were found to be involved in various functions such as,  
30 epithelia cell differentiation and development, proteolysis, gland development, muscle fiber  
31 development, response to hormone stimulus. The identified DEGs can be directly or indirectly  
32 involved in the pathway of pathogenesis of endometriosis and can act as a potential biomarker for  
33 ectopic endometrium. Current study will provide a preliminary insight into the mechanism of  
34 endometriosis disease; however, it will require further detailed studies for its complete path of  
35 action.

36

37

38

## 39 **Introduction**

40 Endometriosis is a pronouncing gynecological disease presently concerning about the women  
41 health. It's a disease with presence of endometrial glands and stromal tissues outside the uterine  
42 endometrium (eutopic region) to ectopic regions (pelvic peritonium, on fallopian tubes or on  
43 ovaries)(1–3). It is an estrogen dependent disorder, with which about 5-10% reproductively active  
44 and 20-50% women diagnosed with infertility suffer worldwide (4). The etiology and pathogenesis  
45 of endometriosis is still unclear, and it's directly or indirectly burdens economic as well as  
46 reproductive health of the women(5). A number of theories have been postulated to explain its  
47 cause of occurrence, but none has been accepted widely. Sampson's theory of retrograde  
48 mensuration is based on the endometrial cells being transported from eutopic regions (uterine  
49 location) to ectopic regions (outside uterine locations), causing the endometriosis disease(6).  
50 However extensive studies have been needed to differentiate between expression patterns in eutopic  
51 endometrium and normal uterine endometrium (ectopic) (7). A non-invasive diagnostic marker  
52 using serum, urine or endometrial tissue samples is now needed for early diagnosis of the  
53 disease(8). The precise mechanism affecting the overall mechanism is still unknown. RNA-Seq  
54 analysis is recently developed new approach to study transcriptomes using deep-sequencing  
55 technologies(9). Transcriptome is the complete set of transcripts in a cell and their total quantity for  
56 a particular physiological condition, and it help us to understand the functional elements working at  
57 that time(10). The molecular analysis of endometrium of diseased women in comparison to normal  
58 endometrium as control will be helpful in understanding the disease pathophysiology with specific  
59 biomarker for its diagnosis.

## 60 **Material and Methods**

### 61 **Microarray data and samples**

62 From the National Center of Biotechnology Information (NCBI) Gene Expression Omnibus (GEO)  
63 database (<http://www.ncbi.nlm.nih.gov/geo/>), the raw gene expression profile datasets (ID:  
64 GSE7305) were obtained for this study (11). For this data set samples were from tissues of normal  
65 eutopic endometrium, and ectopic together with eutopic endometrium from endometriosis patients.  
66 In the study, genes involved in eutopic and ectopic endometrium of control and endometriosis  
67 patient samples were undertaken and analyzed using several bioinformatic tools. The microarray  
68 study was duly approved by ethical committee of the Institution, Banaras Hindu University ((No.  
69 **Dean/2018/EC/936**)).

### 70 **Data processing and DEG's screening**

71 From the datasets of raw gene expression, the expression values of probes corresponding to specific  
72 gene were averaged to obtain the gene expression values. Then by using BiGGESTs software  
73 analysis tool, up and down regulated genes were selected. Further with GEO2R ([https://www.](https://www.ncbi.nlm.nih.gov/geo/geo2r/)  
74 [ncbi.nlm.nih.gov/geo/geo2r/](https://www.ncbi.nlm.nih.gov/geo/geo2r/)) the probe-level symbols were converted into gene-level symbols,  
75 where all the selected DEG's were having p-values<.05, with threshold logFC values>0.1 for up  
76 and <-0.1 for down regulated genes(12).

### 77 **Principal component analysis and heat map generation**

78 Using the online tool ClustVis (13), Principal component analysis (PCA) was performed and heat  
79 map was generated. PCA was plotted only for DEG's, and it was not possible to prepare PCA plot  
80 for the total gene expression as because ClustVis supports only file size up to 2MB.

### 81 **Identification of novel biomarkers related to endometriosis**

82 To filter out the novel bio-markers related to endometriosis, list of differentially expressed genes  
83 were compared to the reported gene list obtained from OMIM (<https://www.omim.org/>) and Gene  
84 Cards (<https://www.genecards.org/>) (14). For comparison and venn diagram construction Venny 2.1  
85 (<https://bioinfogp.cnb.csic.es/tools/venny/>) (15) was used.

### 86 **Construction of protein-protein interaction (PPI) network and sub-network mining**

87 DEG's were identified and uploaded on STRING v 10.5 (<http://www.string-db.org/>) (16). STRING  
88 is an online database that predicts functional interactions between proteins, giving a combined score  
89 for PPI among gene pairs. Combined score was set as >0.4, as the baseline criteria and further  
90 network and sub-network were created using Cytoscape v 3.2.1. Cytoscape  
91 (<http://www.cytoscape.org/>) (17) is a software for visualization and analysis of biological networks  
92 with high throughput data, where clustering coefficient and edge betweenness were taken as criteria  
93 for network constructions.

### 94 **Functional and pathway enrichment analysis of DEG's**

95 Gene ontology (GO) enrichment analysis includes biological processes (BP), molecular functions  
96 (MF) and cellular components (CC), and it was performed using DAVID v 6.8. DAVID (database  
97 for annotation, visualization and intergrated discovey, <http://david.abcc.ncifcrf.gov/>)(18), a  
98 programme integrates comprehensive set of functional annotation of a large gene list. On the basis  
99 of hypergenometric distribution, DAVID takes the genes with similar or related functions as a  
100 whole set.

## 101 **Results**

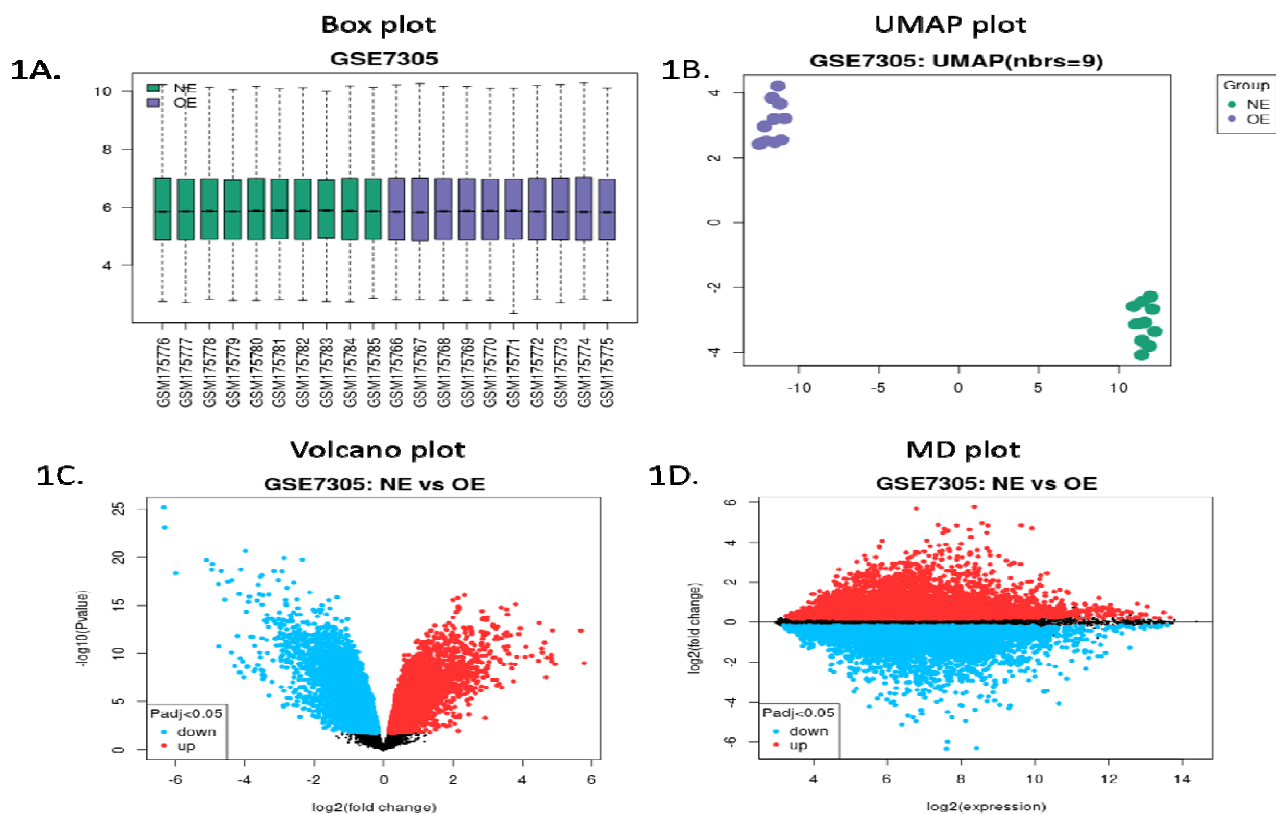

102  
103  
104

**Figure 1:** Data normalization and DEG's visualization via Box plot (A), UMAP plot (B), Volcano plot (C) and MD plot (D).

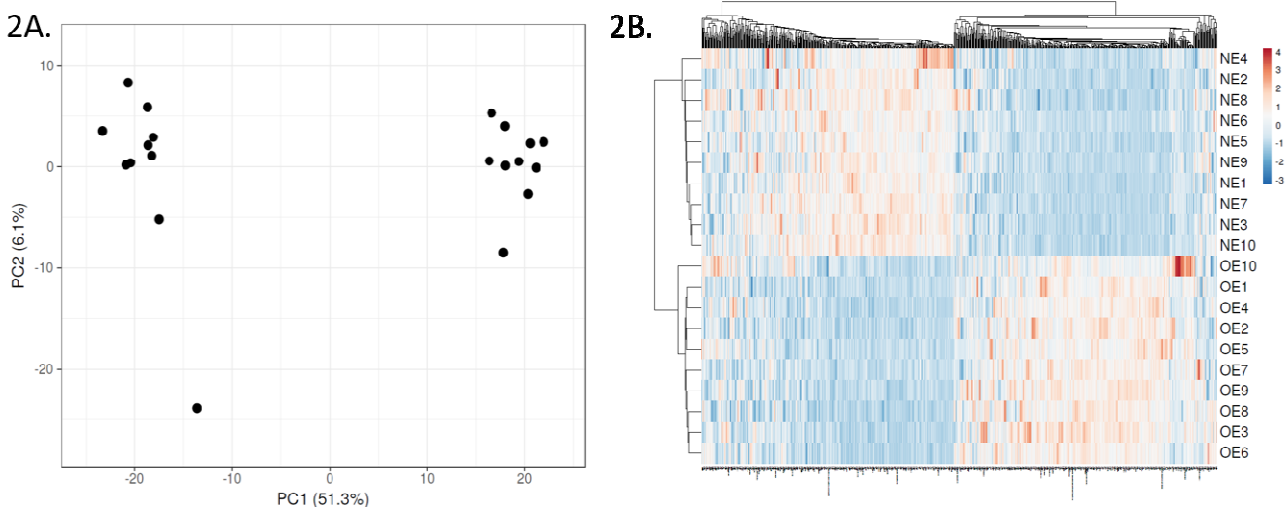

105  
106  
107

**Figure 2:** Heat map of DEG's. Blue to orange gradation is for small to large changes in gene expression values.

3A.

UP CS>0.9

Down CS>0.9

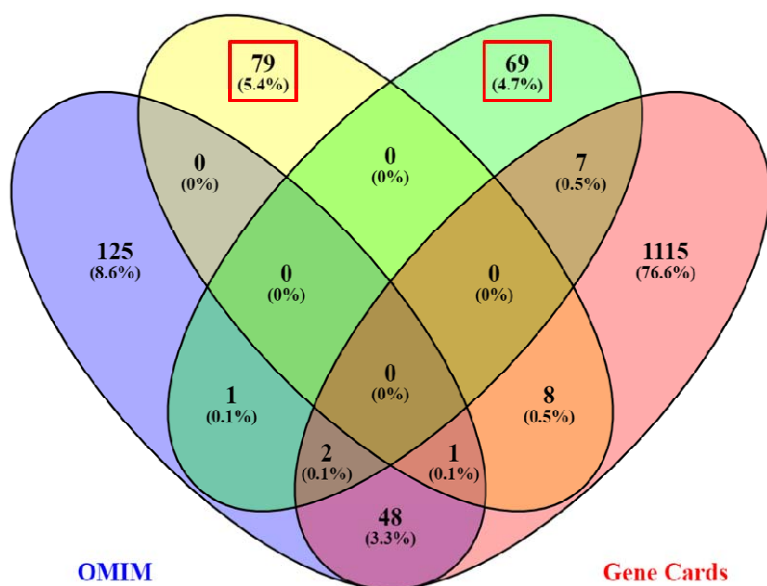

| DEGs                  | Number |
|-----------------------|--------|
| Total DEGs            | 552    |
| UP DEGs               | 312    |
| Down DEGs             | 240    |
| UP DEGs with cs>0.9   | 88     |
| Down DEGs with cs>0.9 | 79     |
| Reported DEGs         | 19     |
| Total Novel DEGs      | 148    |
| Novel UP DEGs         | 79     |
| Novel Down DEGs       | 69     |

108  
109

**Figure 3:** Venn diagram of the differentially expressed genes (DEGs).

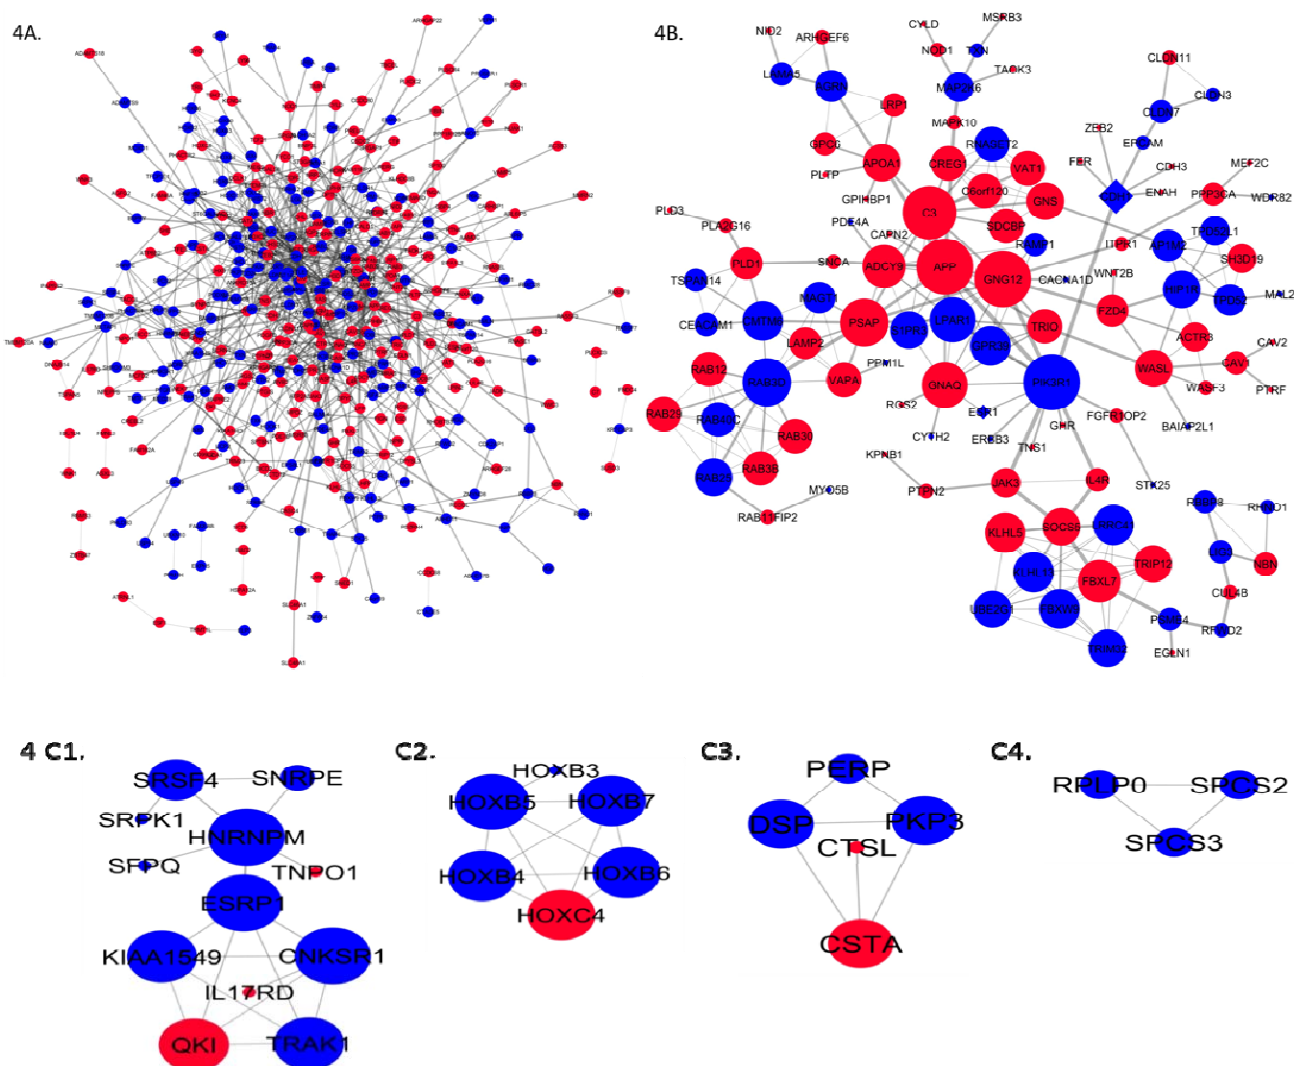

110  
 111 **Figure 4:** (A and B) Protein-protein interaction (PPI) of DEG's. C1, C2, C3 and C4 are four sub-  
 112 networks of DEG's: C1; sub-network 1, C2; sub-network 2, C3; sub-network 3, C4; sub-network 4.  
 113 Red-circle for up and blue-circle for down-regulated genes respectively. Blue diamond for similar  
 114 related genes and lines shows the correlation between genes, where thickness of lines (edges), is  
 115 proportional to the combined scores.



5A. GENE ONTOLOGY (GO) enrichment analysis for up-DEGs

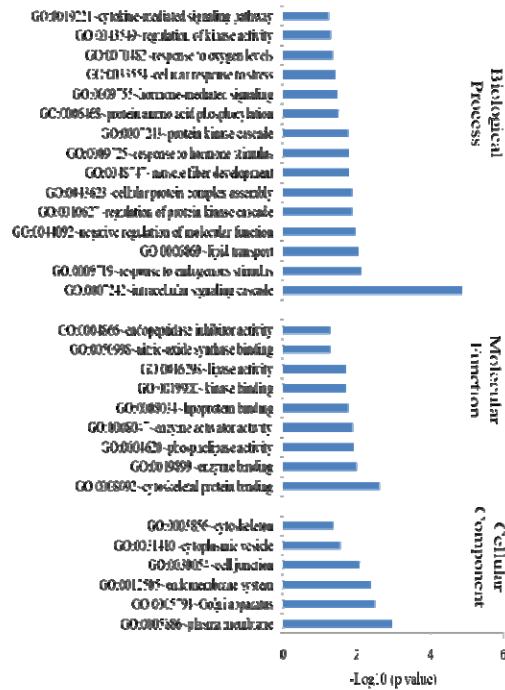

5B. GENE ONTOLOGY (GO) enrichment analysis for down-DEGs

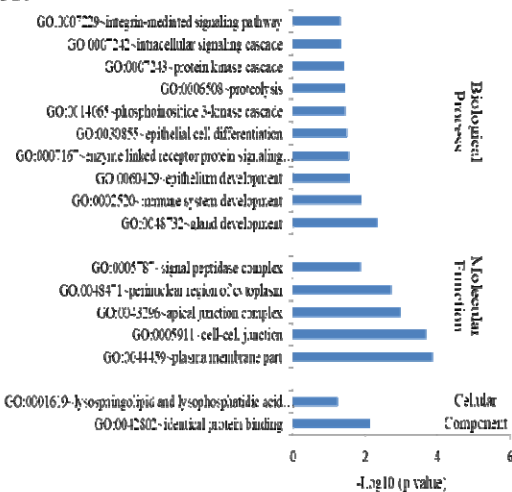

5C. KEGG pathway enrichment for DEGs

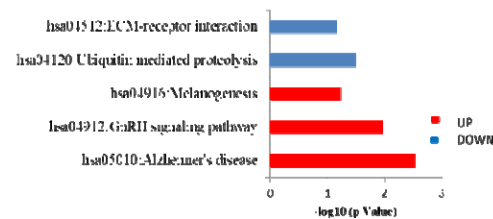

116

117 **Figure 5:** Gene Ontology (GO) enrichment analysis for up-regulated (5A) and down-regulated  
118 DEG's (5B), and KEGG pathway enrichment for DEG's (5C).

| Category      | Term                                                     | P-Value  |
|---------------|----------------------------------------------------------|----------|
| GOTERM_BP_FAT | GO:0007242~intracellular signaling cascade               | 1.34E-05 |
| GOTERM_BP_FAT | GO:0014706~striated muscle tissue development            | 5.44E-04 |
| GOTERM_BP_FAT | GO:0042692~muscle cell differentiation                   | 5.87E-04 |
| GOTERM_BP_FAT | GO:0060537~muscle tissue development                     | 6.80E-04 |
| GOTERM_BP_FAT | GO:0042391~regulation of membrane potential              | 9.31E-04 |
| GOTERM_BP_FAT | GO:0007517~muscle organ development                      | 0.001183 |
| GOTERM_BP_FAT | GO:0051146~striated muscle cell differentiation          | 0.001501 |
| GOTERM_BP_FAT | GO:0010033~response to organic substance                 | 0.002202 |
| GOTERM_BP_FAT | GO:0048878~chemical homeostasis                          | 0.00222  |
| GOTERM_BP_FAT | GO:0010647~positive regulation of cell communication     | 0.002453 |
| GOTERM_BP_FAT | GO:0006873~cellular ion homeostasis                      | 0.004966 |
| GOTERM_BP_FAT | GO:0006928~cell motion                                   | 0.005073 |
| GOTERM_BP_FAT | GO:0055082~cellular chemical homeostasis                 | 0.00541  |
| GOTERM_BP_FAT | GO:0016044~membrane organization                         | 0.005487 |
| GOTERM_BP_FAT | GO:0007519~skeletal muscle tissue development            | 0.00605  |
| GOTERM_BP_FAT | GO:0060538~skeletal muscle organ development             | 0.00605  |
| GOTERM_BP_FAT | GO:0009967~positive regulation of signal transduction    | 0.006229 |
| GOTERM_BP_FAT | GO:0009719~response to endogenous stimulus               | 0.007589 |
| GOTERM_BP_FAT | GO:0050801~ion homeostasis                               | 0.007991 |
| GOTERM_BP_FAT | GO:0032273~positive regulation of protein polymerization | 0.008595 |
| GOTERM_BP_FAT | GO:0006869~lipid transport                               | 0.008949 |
| GOTERM_BP_FAT | GO:0042592~homeostatic process                           | 0.009037 |

|               |                                                      |          |
|---------------|------------------------------------------------------|----------|
| GOTERM_BP_FAT | GO:0048741~skeletal muscle fiber development         | 0.010712 |
| GOTERM_BP_FAT | GO:0044092~negative regulation of molecular function | 0.011126 |
| GOTERM_BP_FAT | GO:0001765~membrane raft formation                   | 0.011205 |
| GOTERM_BP_FAT | GO:0045807~positive regulation of endocytosis        | 0.011464 |
| GOTERM_BP_FAT | GO:0010876~lipid localization                        | 0.011736 |
| GOTERM_BP_FAT | GO:0052547~regulation of peptidase activity          | 0.012493 |
| GOTERM_BP_FAT | GO:0010627~regulation of protein kinase cascade      | 0.012994 |
| GOTERM_MF_FAT | GO:0008092~cytoskeletal protein binding              | 0.002399 |
| GOTERM_MF_FAT | GO:0016504~peptidase activator activity              | 0.007702 |
| GOTERM_MF_FAT | GO:0019899~enzyme binding                            | 0.010389 |
| GOTERM_MF_FAT | GO:0003779~actin binding                             | 0.01129  |
| GOTERM_MF_FAT | GO:0004620~phospholipase activity                    | 0.012226 |
| GOTERM_MF_FAT | GO:0008047~enzyme activator activity                 | 0.012783 |
| GOTERM_MF_FAT | GO:0008289~lipid binding                             | 0.015001 |
| GOTERM_MF_FAT | GO:0008034~lipoprotein binding                       | 0.017323 |
| GOTERM_MF_FAT | GO:0019900~kinase binding                            | 0.019893 |
| GOTERM_MF_FAT | GO:0016298~lipase activity                           | 0.020073 |
| GOTERM_MF_FAT | GO:0070290~NAPE-specific phospholipase D activity    | 0.028556 |
| GOTERM_MF_FAT | GO:0042802~identical protein binding                 | 0.030878 |
| GOTERM_MF_FAT | GO:0070064~proline-rich region binding               | 0.03417  |
| GOTERM_MF_FAT | GO:0008035~high-density lipoprotein binding          | 0.039752 |
| GOTERM_MF_FAT | GO:0004630~phospholipase D activity                  | 0.039752 |
| GOTERM_MF_FAT | GO:0008139~nuclear localization sequence binding     | 0.039752 |
| GOTERM_MF_FAT | GO:0019904~protein domain specific binding           | 0.042369 |
| GOTERM_MF_FAT | GO:0050998~nitric-oxide synthase binding             | 0.050821 |
| GOTERM_MF_FAT | GO:0004866~endopeptidase inhibitor activity          | 0.05148  |
| GOTERM_MF_FAT | GO:0030414~peptidase inhibitor activity              | 0.058629 |
| GOTERM_CC_FAT | GO:0030055~cell-substrate junction                   | 4.14E-04 |
| GOTERM_CC_FAT | GO:0005886~plasma membrane                           | 0.001132 |
| GOTERM_CC_FAT | GO:0005912~adherens junction                         | 0.001789 |
| GOTERM_CC_FAT | GO:0005626~insoluble fraction                        | 0.002358 |
| GOTERM_CC_FAT | GO:0005925~focal adhesion                            | 0.002595 |
| GOTERM_CC_FAT | GO:0070161~anchoring junction                        | 0.002815 |
| GOTERM_CC_FAT | GO:0005924~cell-substrate adherens junction          | 0.002983 |
| GOTERM_CC_FAT | GO:0005794~Golgi apparatus                           | 0.00324  |
| GOTERM_CC_FAT | GO:0009986~cell surface                              | 0.003371 |
| GOTERM_CC_FAT | GO:0012505~endomembrane system                       | 0.004123 |
| GOTERM_CC_FAT | GO:0031982~vesicle                                   | 0.004141 |
| GOTERM_CC_FAT | GO:0005624~membrane fraction                         | 0.005317 |
| GOTERM_CC_FAT | GO:0048471~perinuclear region of cytoplasm           | 0.00559  |
| GOTERM_CC_FAT | GO:0016323~basolateral plasma membrane               | 0.00569  |
| GOTERM_CC_FAT | GO:0044431~Golgi apparatus part                      | 0.006169 |
| GOTERM_CC_FAT | GO:0030027~lamellipodium                             | 0.007163 |
| GOTERM_CC_FAT | GO:0044459~plasma membrane part                      | 0.008355 |
| GOTERM_CC_FAT | GO:0030054~cell junction                             | 0.008464 |



|               |                                                 |          |
|---------------|-------------------------------------------------|----------|
| GOTERM_CC_FAT | GO:0009925~basal plasma membrane                | 0.009319 |
| GOTERM_CC_FAT | GO:0045178~basal part of cell                   | 0.012293 |
| GOTERM_CC_FAT | GO:0031088~platelet dense granule membrane      | 0.016805 |
| GOTERM_CC_FAT | GO:0000267~cell fraction                        | 0.017154 |
| GOTERM_CC_FAT | GO:0044421~extracellular region part            | 0.017907 |
| GOTERM_CC_FAT | GO:0000139~Golgi membrane                       | 0.020736 |
| GOTERM_CC_FAT | GO:0031410~cytoplasmic vesicle                  | 0.027418 |
| GOTERM_CC_FAT | GO:0005955~calcineurin complex                  | 0.027853 |
| GOTERM_CC_FAT | GO:0042827~platelet dense granule               | 0.033332 |
| GOTERM_CC_FAT | GO:0005901~caveola                              | 0.03462  |
| GOTERM_CC_FAT | GO:0016023~cytoplasmic membrane-bounded vesicle | 0.034768 |
| GOTERM_CC_FAT | GO:0005615~extracellular space                  | 0.038156 |
| GOTERM_CC_FAT | GO:0031988~membrane-bounded vesicle             | 0.040294 |
| GOTERM_CC_FAT | GO:0042995~cell projection                      | 0.0416   |
| GOTERM_CC_FAT | GO:0031252~cell leading edge                    | 0.042819 |
| GOTERM_CC_FAT | GO:0005856~cytoskeleton                         | 0.043217 |
| GOTERM_CC_FAT | GO:0005576~extracellular region                 | 0.051766 |
| GOTERM_CC_FAT | GO:0019898~extrinsic to membrane                | 0.059319 |

119

120 **Table 1: GENE ONTOLOGY (GO) analysis for down regulated DEGs.**

| Category      | Term                                                             | P-Value  |
|---------------|------------------------------------------------------------------|----------|
| GOTERM_BP_FAT | GO:0048704~embryonic skeletal system morphogenesis               | 1.89E-04 |
| GOTERM_BP_FAT | GO:0048706~embryonic skeletal system development                 | 6.00E-04 |
| GOTERM_BP_FAT | GO:0048705~skeletal system morphogenesis                         | 0.002413 |
| GOTERM_BP_FAT | GO:0048562~embryonic organ morphogenesis                         | 0.004473 |
| GOTERM_BP_FAT | GO:0048732~gland development                                     | 0.004717 |
| GOTERM_BP_FAT | GO:0009952~anterior/posterior pattern formation                  | 0.005363 |
| GOTERM_BP_FAT | GO:0043009~chordate embryonic development                        | 0.006282 |
| GOTERM_BP_FAT | GO:0009792~embryonic development ending in birth or egg hatching | 0.006557 |
| GOTERM_BP_FAT | GO:0048568~embryonic organ development                           | 0.010931 |
| GOTERM_BP_FAT | GO:0002520~immune system development                             | 0.012496 |
| GOTERM_BP_FAT | GO:0003002~regionalization                                       | 0.01722  |
| GOTERM_BP_FAT | GO:0048598~embryonic morphogenesis                               | 0.018973 |
| GOTERM_BP_FAT | GO:0001501~skeletal system development                           | 0.021983 |
| GOTERM_BP_FAT | GO:0060429~epithelium development                                | 0.027277 |
| GOTERM_BP_FAT | GO:0007167~enzyme linked receptor protein signaling pathway      | 0.02859  |
| GOTERM_BP_FAT | GO:0030097~hemopoiesis                                           | 0.030857 |
| GOTERM_BP_FAT | GO:0030855~epithelial cell differentiation                       | 0.031589 |
| GOTERM_BP_FAT | GO:0014065~phosphoinositide 3-kinase cascade                     | 0.034668 |
| GOTERM_BP_FAT | GO:0060216~definitive hemopoiesis                                | 0.034668 |
| GOTERM_BP_FAT | GO:0015031~protein transport                                     | 0.036558 |
| GOTERM_BP_FAT | GO:0006508~proteolysis                                           | 0.036929 |
| GOTERM_BP_FAT | GO:0007243~protein kinase cascade                                | 0.038188 |
| GOTERM_BP_FAT | GO:0045184~establishment of protein localization                 | 0.038276 |
| GOTERM_BP_FAT | GO:0006465~signal peptide processing                             | 0.039523 |
| GOTERM_BP_FAT | GO:0009057~macromolecule catabolic process                       | 0.041345 |
| GOTERM_BP_FAT | GO:0048534~hemopoietic or lymphoid organ development             | 0.04171  |

|               |                                                                         |          |
|---------------|-------------------------------------------------------------------------|----------|
| GOTERM_BP_FAT | GO:0007389~pattern specification process                                | 0.045236 |
| GOTERM_BP_FAT | GO:0007242~intracellular signaling cascade                              | 0.047661 |
| GOTERM_BP_FAT | GO:0007229~integrin-mediated signaling pathway                          | 0.048307 |
| GOTERM_BP_FAT | GO:0045022~early endosome to late endosome transport                    | 0.04916  |
| GOTERM_BP_FAT | GO:0008380~RNA splicing                                                 | 0.054478 |
| GOTERM_CC_FAT | GO:0044459~plasma membrane part                                         | 1.39E-04 |
| GOTERM_CC_FAT | GO:0005911~cell-cell junction                                           | 2.12E-04 |
| GOTERM_CC_FAT | GO:0043296~apical junction complex                                      | 0.001043 |
| GOTERM_CC_FAT | GO:0016327~apicolateral plasma membrane                                 | 0.001165 |
| GOTERM_CC_FAT | GO:0048471~perinuclear region of cytoplasm                              | 0.001881 |
| GOTERM_CC_FAT | GO:0030057~desmosome                                                    | 0.003648 |
| GOTERM_CC_FAT | GO:0005787~signal peptidase complex                                     | 0.013552 |
| GOTERM_CC_FAT | GO:0070695~FHF complex                                                  | 0.022487 |
| GOTERM_CC_FAT | GO:0030054~cell junction                                                | 0.02936  |
| GOTERM_CC_FAT | GO:0005886~plasma membrane                                              | 0.036058 |
| GOTERM_CC_FAT | GO:0070161~anchoring junction                                           | 0.043114 |
| GOTERM_CC_FAT | GO:0045177~apical part of cell                                          | 0.047573 |
| GOTERM_CC_FAT | GO:0030897~HOPS complex                                                 | 0.053135 |
| GOTERM_MF_FAT | GO:0042802~identical protein binding                                    | 0.007236 |
| GOTERM_MF_FAT | GO:0001619~lysosphingolipid and lysophosphatidic acid receptor activity | 0.05657  |

121

122 **Table 2:** GENE ONTOLOGY (GO) analysis for down regulated DEGs.

123

### 124 **Differentially expressed genes (DEGs)**

125 A total of 552 DEG's were identified with p-value<0.05, out of which 312 were found to be up-  
 126 regulated while 240 were down-regulated. Out of total 552 DEGs, 148 DEG's were found to be  
 127 novel of which 79 were up and 69 were down-regulated DEG's, and these were selected on the  
 128 basis of their average gene expression values.

### 129 **Principal component and hierarchical clustering analysis of DEGs**

130 Uniform manifold approximation and projection plot (umap) shows clustering of data with  
 131 neighborhood scoring 9. Heat-map was constructed for DEG's, which shows a data matrix where  
 132 coloring gives an overview of the numeric differences for gene expressions. The Up regulated  
 133 DEG's are shown in orange and while down regulated are shown in blue color. The blue to orange  
 134 gradation shows the values changing from small to large for the gene expressions.

### 135 **The protein-protein interaction network**

136 Based on the combined score calculated by STRING, a total of 297 gene pairs (combined  
 137 score>0.9) were found to interact with each other, forming a prime network having 114 nodes and  
 138 237 edges respectively (Figure 4) while 4 sub-networks were extracted separately. Upregulated  
 139 DEGs like C3, APP, GNG12, PSAP, GNAQ were forming hub nodes while down-regulated DEG's  
 140 forming hub nodes were LPAR1, RAB3D, PIK3R1, TRIM32, CMTM6. The clustering coefficient  
 141 and edge betweenness were taken as a basic criterion for the selection of hub nodes.

### 142 **Sub-network extraction**

143 Four sub-networks C1, C2, C3 and C4 were extracted from the main network with the use of  
 144 Cytoscape (Fig. 4). All genes in sub-network C4 were down regulated while in sub-networks C1,  
 145 C2, C3, 3, 1, 2, genes were up-regulated and 9, 5, 3 genes were down-regulated respectively.

## 146 **Gene Ontology and pathway enrichment analysis**

147 Functional enrichment analysis was performed and significantly enriched major molecular  
148 functions, biological processes and cellular components of DEGs (FDR<0.05) were listed in Tables  
149 1 and 2. The results of GO enrichment analyses identifies hormone mediated-signaling, muscle  
150 fiber development, intracellular signaling cascade and cellular protein complex assembly as major  
151 significant biological processes for upregulated DEGs (5A). While processes like, proteolysis,  
152 immune system development, epithelial cell differentiation and development are major significant  
153 biological processes related to downregulated DEGs (5B). Furthermore, KEGG pathway  
154 enrichment analysis (Fig.5C) revealed ECM-receptor interaction and ubiquitin mediated proteolysis  
155 as downregulated pathways while melanogenesis, GnRH signaling pathway and alzimers disease  
156 pathway are upregulated pathways.

## 157 **Discussion**

158 Endometriosis is a gynecological disease that affects the reproductive health of a women. The  
159 present study was performed to understand the molecular mechanisms involved in the complexity  
160 of the endometriosis disease progression in the reproductive women. In this study gene expression  
161 datasets were analyzed thoroughly by using different bioinformatics tools, which has revealed total  
162 of 552 DEGs, in which 312 were up and 240 down-regulated respectively. The up-regulated DEG's  
163 are involved in Biological processes like cytokine mediated signaling pathway, cellular response to  
164 stress, hormone-mediated signaling, lipid transport, response to endogenous stimulus etc, Molecular  
165 Functions like lipase, kinase, lipoprotein, enzyme and cytoskeleton protein binding, enzyme  
166 activator and phospholipase activity. These up-regulated DEG's are part of cellular components that  
167 includes cytoskeleton, cytoplasmic vesicle, cell junctions, endomembrane system, golgi apparatus  
168 and plasma membrane. The down-regulated DEG's are involved in biological processes like  
169 proteolysis, glands and immune system development, integrin-mediated, intracellular and protein  
170 kinase cascade etc. These DEG's in molecular functions are a part of signal peptidase, apical  
171 junction, cell-cell junction complex, perinuclear regions and plasma membrane. While these as  
172 cellular components are involved in lysosphingolipid and lysophosphatidic acid and in identical  
173 protein binding. Major DEGs forming hub nodes are C3, APP, GNG12, PSAP, GNAQ, LPAR1,  
174 RAB3D, PIK3R1, TRIM32, CMTM6. In these C3, APP, GNG12, PSAP, GNAQ, are up-regulated  
175 and LPAR1, RAB3D, PIK3R1, TRIM32, CMTM6 are down-regulated DEG's.

176 **C3** (Complement Component 3) is one of the important complement proteins out of 30 recognized  
177 till date. C3 has intensive and pivotal role in complement activation in both classical and alternative  
178 pathways. The alternative pathway is independent of antigen-antibody complexes and can directly  
179 be induced by components of cell wall of bacteria or present on the surface of damaged host cell via  
180 C3 unlike classical and lectin pathway (19). Altered immune system is among the various risk  
181 factors which are involved in pathophysiology of endometriosis and hence deregulated C3 (which is  
182 an important player of immune system) might be involved in the progression of endometriosis and  
183 can be considered as a potent biomarker.

184 **APP** (Amyloid precursor protein), plays an important role in synaptic activity and neuronal  
185 plasticity, but upto this time it's not completely revealed (20). APP gene has been found to be  
186 associated with down's syndrome (21). Mutation in APP gene were also found to be associated with  
187 dementia and Alzimers disease including amyloid deposition, neurofibrillary tangle formation and

188 cerebral amyloid angiopathy (CAA)(22). APP is involved in the proliferation, migration and  
189 adhesion of endothelial cells. It mediates stability to focal adhesion and cell-cell junctions, while its  
190 necessary for VEGF-A growth factor responses (23). Thus, it can be said that APP may be a factor  
191 to be involved in the adhesion and cellular junction formation of endometrial tissues during  
192 endometriosis.

193 **GNG12** is known as the c12 subunit of G protein, and G proteins are made by three different  
194 subunits a, b and c making heterotrimeric. The different subunits are interchangeable, making  
195 possible combinations and wide array of effects. GNG12 is highly conserved, as and its homologs  
196 are present in human, rat, cow, frog, chicken and zebrafish. C12 is expressed differentially in  
197 mammalian brain, where its localized in glial cells and expressed in reactive astrocytes (24).

198 **PSAP (Prosaposin)**, also known as SGP-1) is an intriguing multifunctional protein that plays roles  
199 intracellularly in regulation of lysosomal enzyme functions, and extracellularly, as a secretory factor  
200 having both neuroprotective and glioprotective effects. PSAP gene encodes a 524 amino-acid  
201 precursor protein prosaposin (pSAP), that gives 4 small glycoproteins-saposins (SapA, B, C and D)  
202 (25). Saposins, a sphingolipid activator protein that's required for the function of lysosomal  
203 hydrolases. Mutation in PSAP gene (two null alleles) in an individual have pSap deficiency and  
204 suffer with fatal infantile lysosomal storage disease(26). Defects of Sap A and SapC leads to  
205 atypical Krabbe and Gaucher disease (27). Any defect in SapB results in MLD (metachromatic  
206 leukodystrophy) due to impaired degradation and accumulation of cerebroside-3 sulfate (sulfatide)  
207 (28), while SapD deficiency causes Farber disease in mice (29).

208 **GNAQ** (Gnaq) is a member of guanine nucleotide binding protein (G protein) subunits and is found  
209 abundantly in brain. Gnaq gene knocking shows serious nervous dysfunction and endocrine system  
210 in mice (30). Gnaq gene mutation has been reported mostly in uveal melanoma (31). Gnaq, Gq  
211 protein a-subunit, encoded by GNAQ gene, is a member of Gq/11 subfamily of heterotrimeric G  
212 proteins and its ubiquitously expressed in mammalian cells (30,32). GNAQ has role in  
213 cardiovascular system (31), cancer and autoimmune diseases (33). It is found to be coupled with  
214 GPCRs in viral infections(34), but no any expression or mutation studies has been yet reported in  
215 endometriosis, adenomyosis or ovarian carcinoma.

### 216 **PIK3R1**

217 PI3K enzymes are lipid kinases, having a conserved sequences and phosphorylating the  
218 inositol 3-OH groups of membrane phosphoinositides (PI).

219 Class I PI3K convert phosphoinositol biphosphate (PIP2) (4,5) into phosphoinositol trisphosphate  
220 (PIP3) (3,4,5) a second messenger (35). Class IA PI3K is composed of a heterodimer having a p110  
221 catalytic subunit and a p85 regulatory subunit. Out of four PI3K catalytic subunit isoforms (PI3Ka,  
222 PI3Kb, PI3Kg, and PI3Kd), only PI3Ka and PI3Kb are ubiquitously expressed in the body and are  
223 frequently altered in cancer disease (36). Three different genes PIK3R1, PIK3R2, and PIK3R3,  
224 encode p85-type subunits; p85a, p85b and p55g, respectively. The two of PIK3R1 and PIK3R2 are  
225 widely expressed in the body, whereas the third one PIK3R3 is expressed only in testis and brain of  
226 adults (37). PIK3R1/p85a is isoform found abundantly, but in cancer patients its expression is  
227 reduced (38). It's a Tumor-Suppressor Gene and the most striking difference between p85a and  
228 p85b is that PIK3R1/p85a acts as a tumor suppressor while, PIK3R2/p85b is a cancer driver. The  
229 recent finding say that p85a subunit restrains the catalytic activity of PI3K (39) encourage testing

230 the consequences of reducing p85a levels. Other study tells deletion of Pik3r1 led to a gradual  
231 change in hepatocyte morphology (liver) and with over time, mice develops hepatocellular  
232 carcinoma (40). These two observations confirm the deletion of Pik3r1 gene is a cause of tumor  
233 development, as similarly observed for tumor suppressors. Pik3r1 loss in mouse accelerates  
234 HER2/neu-induced mammary cancer development, in cultured human epithelial cells PIK3R1  
235 knockdown cause transformational changes, while hemi-zygous deletion is a frequent event in  
236 breast cancer samples (41). Mutation in PIK3R1 has been reported in breast, pancreatic, colon  
237 cancers (42) and in 8.5% cases of ovarian carcinoma (43). The PIK3 pathway is downstream  
238 regulated from RTK (receptor tyrosine kinase), that's active in cancer lineages, including  
239 endometrial cancer (EC) (44). PIK3 mutation has been reported in ovarian carcinoma but not in  
240 cases where patients suffer with endometriosis only (45). While PI3K pathway has been found to be  
241 strongly implicated during the development of endometriosis (46).

#### 242 **LPAR1**

243 Lysophosphatidic Acid, is a small phospholipid present in many mammalian cells and tissues (47).  
244 It is involved in cell migration, survival, proliferation, cellular interactions and cytoskeleton  
245 changes (48). A study on mare, suffering with endometriosis has indicated that concentration of  
246 LPA, its receptors, PGE2/PGF2 ratio and CTGF secretion is altered during endometriosis (49).  
247 LPA induces IL-8 (Interleukin-8) expression via LPA-1 receptor, Gi protein, MAPK/p38 and NF-  
248 kB signalling pathway. Where IL-8 protein stimulates endometrial cell migration, permeability,  
249 capillary tube formation and proliferation leading to angiogenesis during pregnancy (50).  
250 Overexpression of all LPARs and enzymes occur responsible for LPA synthesis, during endometrial  
251 cancers, showing a positive correlation with myoinvasion and FIGO (International Federation of  
252 Gynecology and Obstetrics) stage (51). Recent study has demonstrated that LPA, acts as a mitogen  
253 and pro-invasive stimulus for endometrial and endometriotic cells acts via LPAR1 and LPAR3  
254 (Lysophosphatidic Acid Receptors). It has demonstrated that LPA-dependent stimulus causes  
255 secretion of cathepsin B, a protease, which acts as a factor for endometriotic invasion (52).

256 **RAB3D**, is a GTPase of Rab family, plays a role as a central regulator of vesicular transport (53). A  
257 study reveals that the Rab3D is implicated in the subcellular localization and maturation of  
258 Immature Secretory granules (ISGs) (54). Rabs are involved in membrane trafficking, cellular  
259 signalling, growth and development. Rabs and their effectors has been found to be overexpressed or  
260 undergone for loss of function in many disease including cancers and causes the disease  
261 progression (55). Endometriosis is also an inflammatory disease and similarly Rab can play its role  
262 in endometriosis disease progression and adhesion.

263 **GPR39**, are G-protein coupled receptors present in the plasma membrane, which is distinct target  
264 for binding of extracellular Zn<sup>+</sup> ions (56–58). G-protein coupled receptors are a large family of  
265 seven-transmembrane proteins, which are all involved in a diverse array of extracellular stimuli  
266 (59). Zinc is an important component of enzymes and proteins. It is also required for intracellular  
267 message transmission, protein synthesis, cell membrane maintenance and transport, regulation of  
268 neuronal, endocrinal system (60). In brain GPR39 zinc sensing receptor has a significant role in  
269 Alzheimer and Epilepsy (61). Further investigations showed that GPR39 contributes its part in skin  
270 wound healing, thus having a positive role in the area of dermatology and stem cell therapy (62). A



271 study has revealed that GPR39 might be a direct promising target for therapy of zincergic  
272 dyshomeostasis observed in Alzheimer's disease, but more studies are still needed over it (63).

273 **HOXC4**, is actively transcribed during the development and differentiation of Lymphoid, myeloid  
274 and erythroid cells. It helps to maintain proliferation in hematopoietic cells(64).

275 Cystatin A (**CSTA**), is a type 1 cystatin super-family member, and is expressed mainly in epithelial  
276 and lymphoid tissues. It prevents the proteolysis of cytoplasmic and cytoskeletal proteins in cells. It  
277 acts a tumor suppressor in esophageal and lung cancer (65). The risk of disease recurrence and  
278 death are found to be higher in patients suffering with squamous cell carcinoma of head and neck,  
279 having low CSTA(66). Here expression analysis of DEGs in endometriosis, CSTA was found to be  
280 downregulated but detailed studies for the role of CSTA in endometriosis disease progression is still  
281 has to be done.

282 Epithelial splicing regulatory protein 1 (**ESRP1**), plays crucial role during organogenesis of  
283 craniofacial and epidermal development, branching morphogenesis in the lungs and salivary glands.  
284 It also plays role during cancer progression, and its expression found to be low in normal epithelium  
285 but upregulated during carcinoma (67).

### 286 **Conclusion**

287 From this study, the conclusion can be derived that these genes are playing diversified roles, but  
288 these may be involved directly or indirectly in the pathophysiology of the endometriosis disease.  
289 There may be that many genes together playing their parts for the disease progression. This study  
290 will help us to understand the disease physiology in a better way but further a detailed study about it  
291 is still needed.

### 292 **Ethics statement**

293 The studies involving human participants were reviewed and approved by Ethics Committee of the  
294 Institutional Ethical committee before starting the study (No. Dean/2018/EC/936).

### 295 **Author contributions**

296 RS, RCand SR conceived and designed the project. KK and AA performed all operations. RB  
297 analyzed the data and drew the figures. KK and RB wrote the manuscript. AA, KK, RB and RS  
298 revised the manuscript. All authors contributed to the article and approved the submitted version.

### 299 **Acknowledgement**

300 We want to extend our sincere gratitude to Multi-Disciplinary Research Units (MRUs) Laboratory, a  
301 grant by ICMR-Department of Health Research.

### 302 **Conflict of interest**

303 The authors declare that the research was conducted in the absence of any commercial or financial  
304 relationships that could be construed as a potential conflict of interest.

### 305 **References**

- 306 1. Parasar P, Ozcan P, Terry KL. Endometriosis: Epidemiology, Diagnosis and Clinical  
307 Management. *Curr Obstet Gynecol Rep*. 2017;6(1):34–41.
- 308 2. Bulun SE. Endometriosis. *N Engl J Med*. 2009 Jan;360(3):268–79.
- 309 3. Nnoaham KE, Hummelshoj L, Webster P, D’Hooghe T, De Cicco Nardone F, De Cicco  
310 Nardone C, et al. Impact of endometriosis on quality of life and work productivity: A  
311 multicenter study across ten countries. *Fertil Steril*. 2011;96(2).
- 312 4. Meuleman C, Vandenabeele B, Fieuws S, Spiessens C, Timmerman D, D’Hooghe T. High  
313 prevalence of endometriosis in infertile women with normal ovulation and normospermic  
314 partners. *Fertil Steril*. 2009;92(1):68–74.
- 315 5. Dai Y, Li X, Shi J, Leng J. A review of the risk factors, genetics and treatment of  
316 endometriosis in Chinese women: A comparative update. Vol. 15, *Reproductive Health*. 2018.  
317 p. 82.
- 318 6. Mathew AG. A Case Exemplifying Sampson’s Theory of the Aetiology of Endometriosis.  
319 *Aust New Zeal J Obstet Gynaecol*. 1963;3(4):159–61.
- 320 7. Liu H, Lang JH. Is abnormal eutopic endometrium the cause of endometriosis? The role of  
321 eutopic endometrium in pathogenesis of endometriosis. *Med Sci Monit*. 2011;17(4):92–9.
- 322 8. Gupta D, Hull ML, Fraser I, Miller L, Bossuyt PMM, Johnson N, et al. Endometrial  
323 biomarkers for the non-invasive diagnosis of endometriosis. Vol. 2016, *Cochrane Database of*  
324 *Systematic Reviews*. 2016.
- 325 9. Hrdlickova R, Toloue M, Tian B. RNA-Seq methods for transcriptome analysis. Vol. 8, *Wiley*  
326 *Interdisciplinary Reviews: RNA*. 2017.
- 327 10. Wang Z, Gerstein M, Snyder M. RNA-Seq: A revolutionary tool for transcriptomics. Vol. 10,  
328 *Nature Reviews Genetics*. 2009. p. 57–63.
- 329 11. Barrett T, Troup DB, Wilhite SE, Ledoux P, Rudnev D, Evangelista C, et al. NCBI GEO:  
330 Mining tens of millions of expression profiles - Database and tools update. *Nucleic Acids Res*.  
331 2007;35(SUPPL. 1):D760–5.
- 332 12. GEO2R - GEO - NCBI [Internet]. [cited 2021 Mar 13]. Available from:  
333 <https://www.ncbi.nlm.nih.gov/geo/geo2r/>
- 334 13. Metsalu T, Vilo J. ClustVis: A web tool for visualizing clustering of multivariate data using  
335 Principal Component Analysis and heatmap. *Nucleic Acids Res*. 2015;43(W1):W566–70.
- 336 14. GeneCards - Human Genes | Gene Database | Gene Search [Internet]. [cited 2021 Mar 13].  
337 Available from: <https://www.genecards.org/>
- 338 15. Venny 2.1.0 [Internet]. [cited 2021 Mar 13]. Available from:



- 339 <https://bioinfogp.cnb.csic.es/tools/venny/>
- 340 16. Franceschini A, Szklarczyk D, Frankild S, Kuhn M, Simonovic M, Roth A, et al. STRING  
341 v9.1: Protein-protein interaction networks, with increased coverage and integration. *Nucleic*  
342 *Acids Res.* 2013;41(D1).
- 343 17. Kohl M, Wiese S, Warscheid B. Cytoscape: software for visualization and analysis of  
344 biological networks. *Methods Mol Biol.* 2011;696:291–303.
- 345 18. Huang DW, Sherman BT, Lempicki RA. Systematic and integrative analysis of large gene lists  
346 using DAVID bioinformatics resources. *Nat Protoc.* 2009;4(1):44–57.
- 347 19. Fishelson Z, Müller-Eberhard HJ. Regulation of the alternative pathway of human  
348 complement by C1q. *Mol Immunol.* 1987;24(9):987–93.
- 349 20. Müller UC, Deller T, Korte M. Not just amyloid: Physiological functions of the amyloid  
350 precursor protein family. Vol. 18, *Nature Reviews Neuroscience.* 2017. p. 281–98.
- 351 21. Hof PR, Bouras C, Perl DP, Sparks DL, Mehta N, Morrison JH. Age-Related Distribution of  
352 Neuropathologic Changes in the Cerebral Cortex of Patients with Down’s Syndrome:  
353 Quantitative Regional Analysis and Comparison with Alzheimer’s Disease. *Arch Neurol.*  
354 1995;52(4):379–91.
- 355 22. Abbatemarco JR, Jones SE, Larvie M, Bekris LM, Khrestian ME, Krishnan K, et al. Amyloid  
356 Precursor Protein Variant, E665D, Associated With Unique Clinical and Biomarker  
357 Phenotype. *Am J Alzheimers Dis Other Demen.* 2021;36.
- 358 23. Ristori E, Cicaloni V, Salvini L, Tinti L, Tinti C, Simons M, et al. Amyloid- $\beta$  Precursor  
359 Protein APP Down-Regulation Alters Actin Cytoskeleton-Interacting Proteins in Endothelial  
360 Cells. *Cells.* 2020;9(11).
- 361 24. Morishita R, Saga S, Kawamura N, Hashizume Y, Inagaki T, Kato K, et al. Differential  
362 localization of the  $\gamma 3$  and  $\gamma 12$  subunits of G proteins in the mammalian brain. *J Neurochem.*  
363 1997;68(2):820–7.
- 364 25. Hiraiwa M, O’Brien JS, Kishimoto Y, Galdzicka M, Fluharty AL, Ginns EI, et al. Isolation,  
365 characterization, and proteolysis of human prosaposin, the precursor of saposins (sphingolipid  
366 activator proteins). *Arch Biochem Biophys.* 1993;304(1):110–6.
- 367 26. Motta M, Tatti M, Furlan F, Celato A, Di Fruscio G, Polo G, et al. Clinical, biochemical and  
368 molecular characterization of prosaposin deficiency. *Clin Genet.* 2016;90(3):220–9.
- 369 27. Spiegel R, Bach G, Sury V, Mengistu G, Meidan B, Shalev S, et al. A mutation in the saposin  
370 A coding region of the prosaposin gene in an infant presenting as Krabbe disease: First report  
371 of saposin A deficiency in humans. *Mol Genet Metab.* 2005;84(2):160–6.

- 372 28. Shaimardanova AA, Chulpanova DS, Solovyeva V V., Mullagulova AI, Kitaeva K V.,  
373 Allegrucci C, et al. Metachromatic Leukodystrophy: Diagnosis, Modeling, and Treatment  
374 Approaches. Vol. 7, *Frontiers in Medicine*. 2020. p. 576221.
- 375 29. Matsuda T, Cepko CL. Electroporation and RNA interference in the rodent retina in vivo and  
376 in vitro. *Proc Natl Acad Sci U S A*. 2004;101(1):16–22.
- 377 30. Wilkie TM, Scherle PA, Strathmann MP, Slepak VZ, Simon MI. Characterization of G-  
378 protein  $\alpha$  subunits in the Gq class: Expression in murine tissues and in stromal and  
379 hematopoietic cell lines. *Proc Natl Acad Sci U S A*. 1991;88(22):10049–53.
- 380 31. D'Angelo DD, Sakata Y, Lorenz JN, Boivin GP, Walsh RA, Liggett SB, et al. Transgenic G $\alpha$ q  
381 overexpression induces cardiac contractile failure in mice. *Proc Natl Acad Sci U S A*.  
382 1997;94(15):8121–6.
- 383 32. Wang Y, Li Y, He Y, Sun Y, Sun W, Xie Q, et al. Expression of G protein  $\alpha$ q Subunit is  
384 Decreased in Lymphocytes from Patients with Rheumatoid Arthritis and is Correlated with  
385 Disease Activity. *Scand J Immunol*. 2012;75(2):203–9.
- 386 33. Wang Y, Xiao H, Wu H, Yao C, He H, Wang C, et al. G protein subunit  $\alpha$  q regulates gastric  
387 cancer growth via the p53/p21 and MEK/ERK pathways. *Oncol Rep*. 2017;37(4):1998–2006.
- 388 34. Lai W, Cai Y, Zhou J, Chen S, Qin C, Yang C, et al. Deficiency of the G protein G $\alpha$ q  
389 ameliorates experimental autoimmune encephalomyelitis with impaired DC-derived IL-6  
390 production and Th17 differentiation. *Cell Mol Immunol*. 2017;14(6):557–67.
- 391 35. Hirsch E, Ciruolo E, Franco I, Ghigo A, Martini M. PI3K in cancer-stroma interactions: Bad in  
392 seed and ugly in soil. Vol. 33, *Oncogene*. Nature Publishing Group; 2014. p. 3083–90.
- 393 36. Vallejo-Díaz J, Chagoyen M, Olazabal-Morán M, González-García A, Carrera AC. The  
394 Opposing Roles of PIK3R1/p85 $\alpha$  and PIK3R2/p85 $\beta$  in Cancer. Vol. 5, *Trends in Cancer*.  
395 2019. p. 233–44.
- 396 37. Vanhaesebroeck B, Vogt PK, Rommel C. PI3K: From the Bench to the Clinic and Back. In:  
397 *Current topics in microbiology and immunology*. 2010. p. 1–19.
- 398 38. Ueki K, Algenstaedt P, Mauvais-Jarvis F, Kahn CR. Positive and Negative Regulation of  
399 Phosphoinositide 3-Kinase-Dependent Signaling Pathways by Three Different Gene Products  
400 of the p85 $\alpha$  Regulatory Subunit. *Mol Cell Biol*. 2000;20(21):8035–46.
- 401 39. Fruman DA. Regulatory Subunits of Class IA PI3K. In: *Current topics in microbiology and*  
402 *immunology*. *Curr Top Microbiol Immunol*; 2010. p. 225–44.
- 403 40. Ueki K, Fruman DA, Brachmann SM, Tseng Y-H, Cantley LC, Kahn CR. Molecular Balance  
404 between the Regulatory and Catalytic Subunits of Phosphoinositide 3-Kinase Regulates Cell

- 405            Signaling and Survival. *Mol Cell Biol.* 2002;22(3):965–77.
- 406 41. Alcázar I, Cortés I, Zaballos A, Hernandez C, Fruman DA, Barber DF, et al. P85β  
407 phosphoinositide 3-kinase regulates CD28 coreceptor function. *Blood.* 2009;113(14):3198–  
408 208.
- 409 42. Jaiswal BS, Janakiraman V, Kljavin NM, Chaudhuri S, Stern HM, Wang W, et al. Somatic  
410 Mutations in p85α Promote Tumorigenesis through Class IA PI3K Activation. *Cancer Cell.*  
411 2009;16(6):463–74.
- 412 43. Sweeney SM, Cerami E, Baras A, Pugh TJ, Schultz N, Stricker T, et al. AACR project genie:  
413 Powering precision medicine through an international consortium. *Cancer Discov.*  
414 2017;7(8):818–31.
- 415 44. Cheung LWT, Hennessy BT, Li J, Yu S, Myers AP, Djordjevic B, et al. High frequency of  
416 PIK3R1 and PIK3R2 mutations in endometrial cancer elucidates a novel mechanism for  
417 regulation of PTEN protein stability. *Cancer Discov.* 2011;1(2):170–85.
- 418 45. Yamamoto S, Tsuda H, Takano M, Iwaya K, Tamai S, Matsubara O. PIK3CA mutation is an  
419 early event in the development of endometriosis-associated ovarian clear cell adenocarcinoma.  
420 *J Pathol.* 2011;225(2):189–94.
- 421 46. Matsumoto T, Yamazaki M, Takahashi H, Kajita S, Suzuki E, Tsuruta T, et al. Distinct β-  
422 catenin and PIK3CA mutation profiles in endometriosis-associated ovarian endometrioid and  
423 clear cell carcinomas. *Am J Clin Pathol.* 2015;144(3):452–63.
- 424 47. Lin ME, Herr DR, Chun J. Lysophosphatidic acid (LPA) receptors: Signaling properties and  
425 disease relevance. Vol. 91, *Prostaglandins and Other Lipid Mediators.* 2010. p. 130–8.
- 426 48. Moolenaar WH, Van Meeteren LA, Giepmans BNG. The ins and outs of lysophosphatidic acid  
427 signaling. Vol. 26, *BioEssays.* 2004. p. 870–81.
- 428 49. Szóstek-Mioduchowska A, Leciejewska N, Zelmańska B, Staszkiwicz-Chodor J, Ferreira-  
429 Dias G, Skarzynski D. Lysophosphatidic acid as a regulator of endometrial connective tissue  
430 growth factor and prostaglandin secretion during estrous cycle and endometrosis in the mare.  
431 *BMC Vet Res.* 2020;16(1).
- 432 50. Chen SU, Lee H, Chang DY, Chou CH, Chang CY, Chao KH, et al. Lysophosphatidic acid  
433 mediates interleukin-8 expression in human endometrial stromal cells through its receptor and  
434 nuclear factor-κB- dependent pathway: A possible role in angiogenesis of endometrium and  
435 placenta. *Endocrinology.* 2008;149(11):5888–96.
- 436 51. Wasniewski T, Woclawek-PotocKa I, Boruszewska D, Kowalczyk-Zieba I, Sinderewicz E,  
437 Grycmacher K. The significance of the altered expression of lysophosphatidic acid receptors,

- 438 autotaxin and phospholipase A2 as the potential biomarkers in type 1 endometrial cancer  
439 biology. *Oncol Rep.* 2015;34(5):2760–7.
- 440 52. Dietze R, Starzinski-Powitz A, Scheiner-Bobis G, Tinneberg HR, Meinhold-Heerlein I,  
441 Konrad L. Lysophosphatidic acid triggers cathepsin B-mediated invasiveness of human  
442 endometriotic cells. *Biochim Biophys Acta - Mol Cell Biol Lipids.* 2018;1863(11):1369–77.
- 443 53. Li G, Marlin MC. Rab family of GTPases. *Methods Mol Biol.* 2015;1298.
- 444 54. Hodneland RR, Copier E, Regazzi J. Rab3D Is Critical for Secretory Granule Maturation in  
445 PC12 Cells. *PLoS One.* 2013;8(3):57321.
- 446 55. Qin X, Wang J, Wang X, Liu F, Jiang B, Zhang Y. Targeting Rabs as a novel therapeutic  
447 strategy for cancer therapy. Vol. 22, *Drug Discovery Today.* 2017. p. 1139–47.
- 448 56. Hershinkel M, Moran A, Grossman N, Sekler I. A zinc-sensing receptor triggers the release of  
449 intracellular Ca<sup>2+</sup> and regulates ion transport. *Proc Natl Acad Sci U S A.* 2001;98(20):11749–  
450 54.
- 451 57. Sunuwar L, Gilad D, Hershinkel M. The zinc sensing receptor, ZnR/GPR39, in health and  
452 disease. Vol. 22, *Frontiers in Bioscience - Landmark.* *Frontiers in Bioscience;* 2017. p. 1469–  
453 92.
- 454 58. Hershinkel M. The zinc sensing receptor, ZnR/GPR39, in health and disease [Internet]. Vol.  
455 19, *International Journal of Molecular Sciences.* 2018. p. 439. Available from:  
456 [www.mdpi.com/journal/ijms](http://www.mdpi.com/journal/ijms)
- 457 59. Hilger D, Masureel M, Kobilka BK. Structure and dynamics of GPCR signaling complexes.  
458 *Nat Struct Mol Biol.* 2018;25(1):4–12.
- 459 60. Takeda A. Movement of zinc and its functional significance in the brain. Vol. 34, *Brain*  
460 *Research Reviews.* 2000. p. 137–48.
- 461 61. Khan MZ. A possible significant role of zinc and GPR39 zinc sensing receptor in Alzheimer  
462 disease and epilepsy. Vol. 79, *Biomedicine and Pharmacotherapy.* 2016. p. 263–72.
- 463 62. Zhao H, Qiao J, Zhang S, Zhang H, Lei X, Wang X, et al. GPR39 marks specific cells within  
464 the sebaceous gland and contributes to skin wound healing. *Sci Rep.* 2015;5.
- 465 63. Rychlik M, Mlyniec K. Zinc-mediated Neurotransmission in Alzheimer’s Disease: A Potential  
466 Role of the GPR39 in Dementia. *Curr Neuropharmacol.* 2019;18(1):2–13.
- 467 64. Zeng J, Sun W, Chang J, Yi D, Zhu L, Zhang Y, et al. HOXC4 up-regulates NF-κB signaling  
468 and promotes the cell proliferation to drive development of human hematopoiesis, especially  
469 CD43+ cells. *Blood Sci.* 2020;2(4):117–28.
- 470 65. Ma Y, Chen Y, Li Y, Grün K, Berndt A, Zhou Z, et al. Cystatin A suppresses tumor cell

- 471 growth through inhibiting epithelial to mesenchymal transition in human lung cancer.  
472 Oncotarget. 2018;9(18):14084–98.
- 473 66. Budihna M, Strojan P, Èmid L, Èkrk J, Vrhovec I, Zupevc A. Prognostic value of cathepsins  
474 B, H, L, D and their endogenous inhibitors stefins A and B in head and neck carcinoma. Biol  
475 Chem Hoppe Seyler. 1996;377(6):385–90.
- 476 67. Hayakawa A, Saitoh M, Miyazawa K. Dual roles for epithelial splicing regulatory proteins 1  
477 (ESRP1) and 2 (ESRP2) in cancer progression. In: Advances in Experimental Medicine and  
478 Biology [Internet]. Springer New York LLC; 2017 [cited 2021 Mar 13]. p. 33–40. Available  
479 from: <https://pubmed.ncbi.nlm.nih.gov/27401076/>
- 480

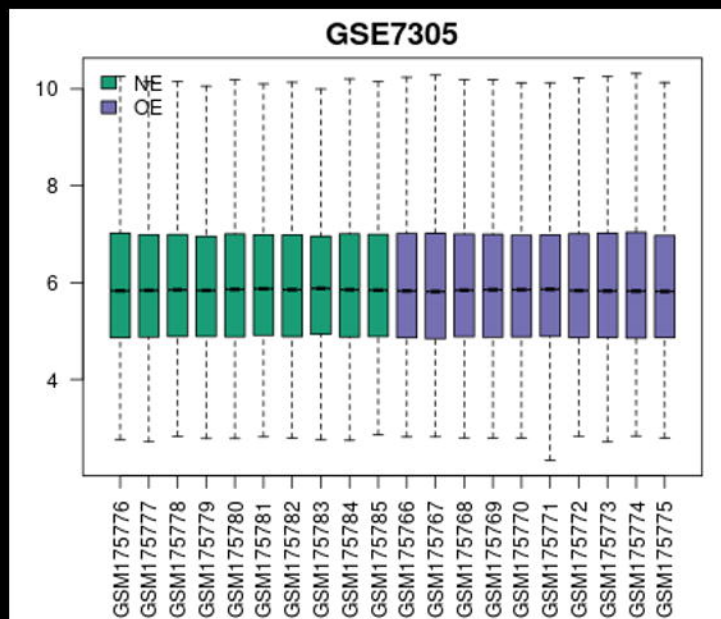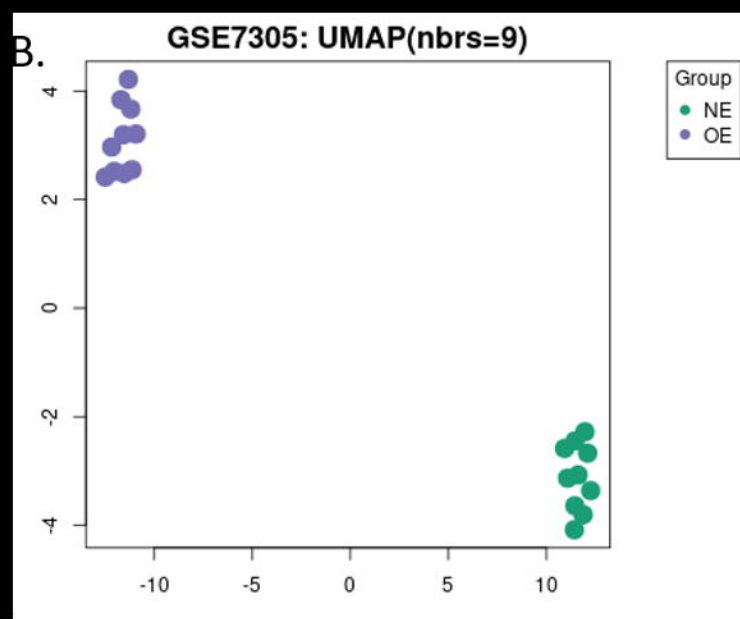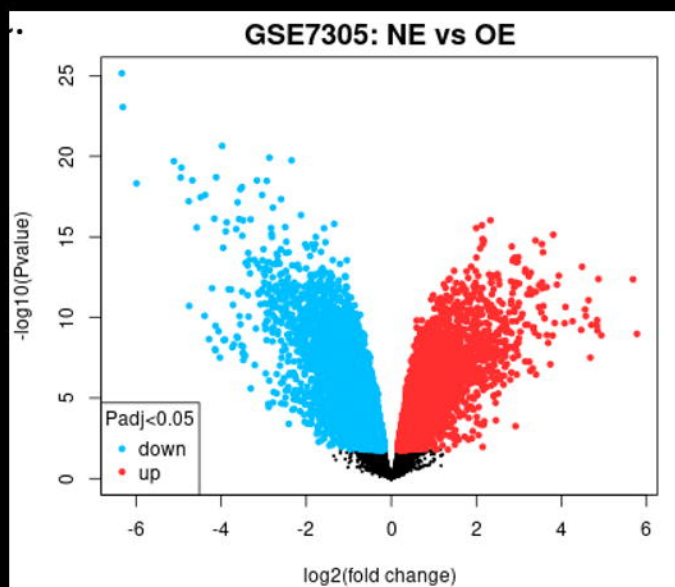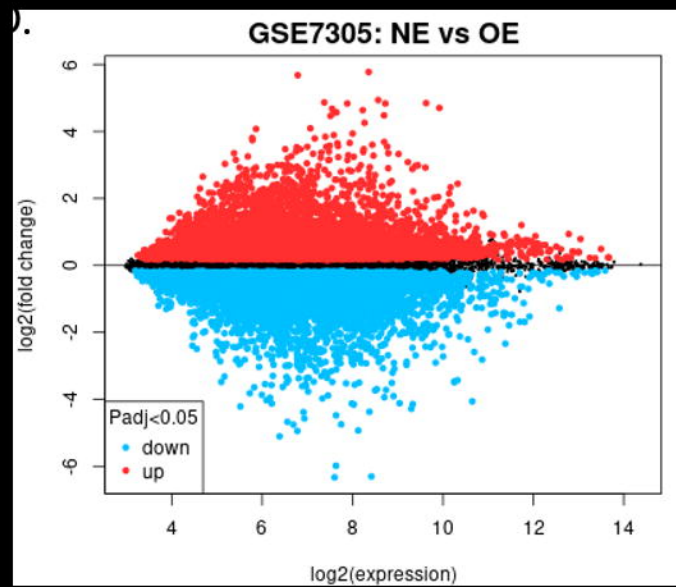



2A.

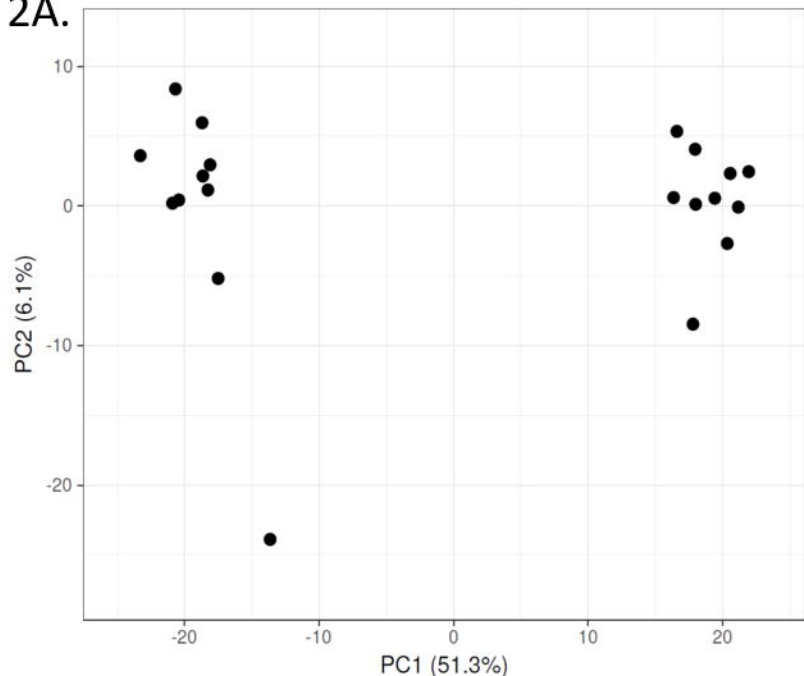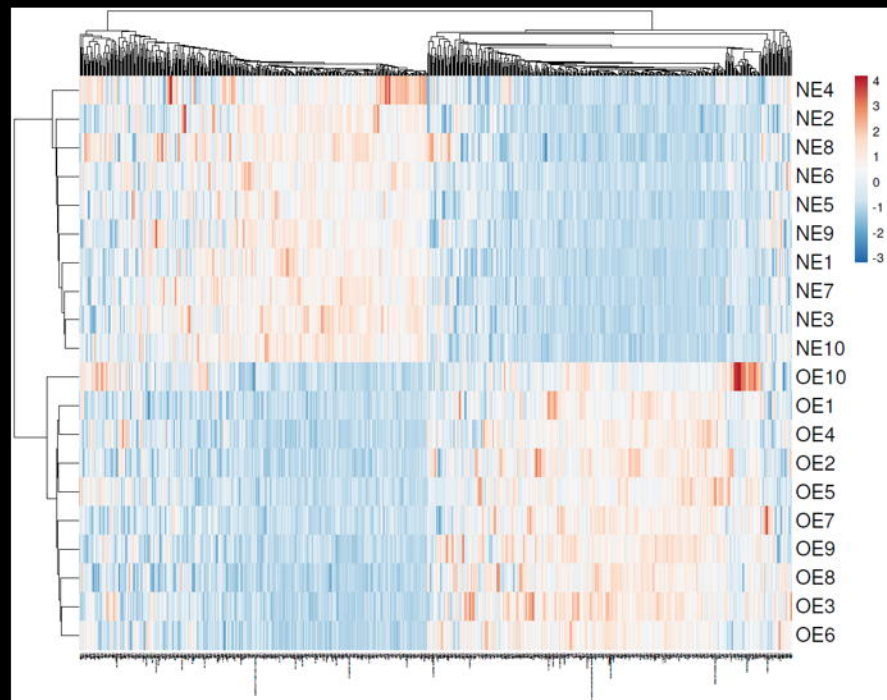



3A.

UP CS&gt;0.9

Down CS&gt;0.9

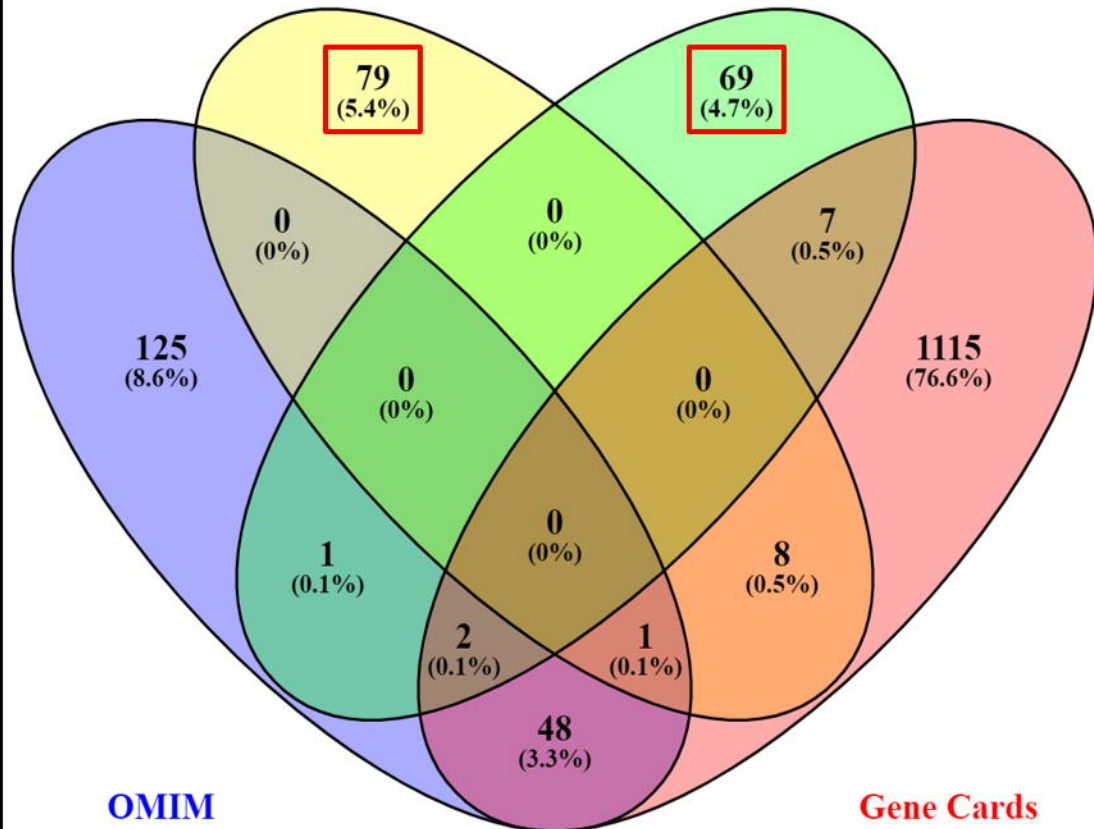

| DEGs                  | Number |
|-----------------------|--------|
| Total DEGs            | 552    |
| UP DEGs               | 312    |
| Down DEGs             | 240    |
| UP DEGs with cs>0.9   | 88     |
| Down DEGs with cs>0.9 | 79     |
| Reported DEGs         | 19     |
| Total Novel DEGs      | 148    |
| Novel UP DEGs         | 79     |
| Novel Down DEGs       | 69     |

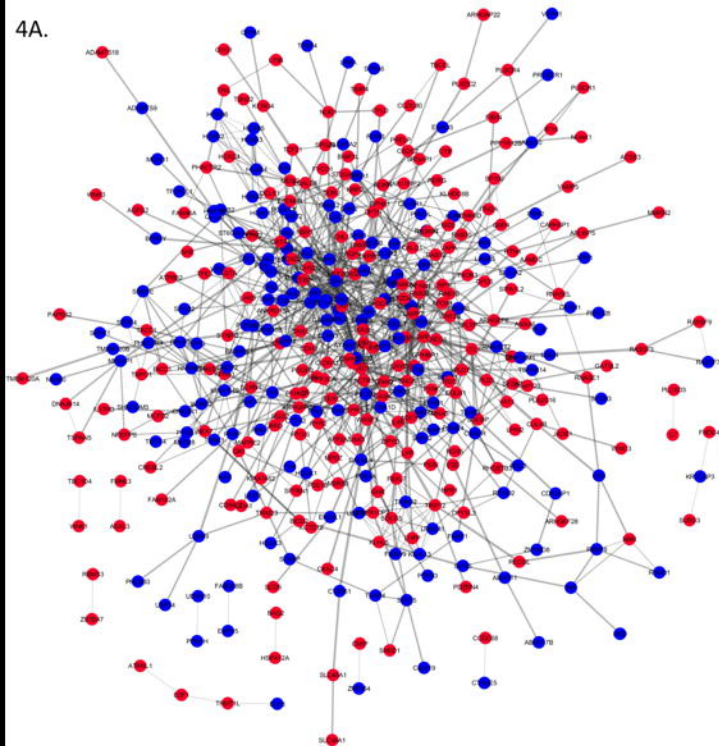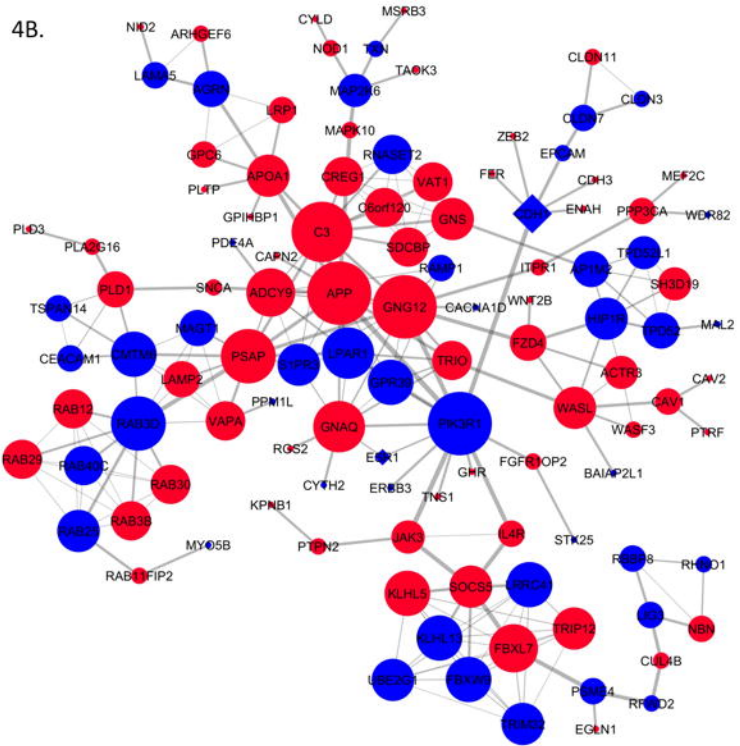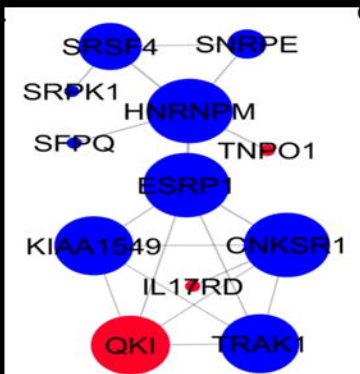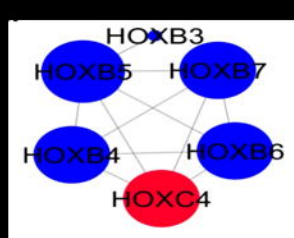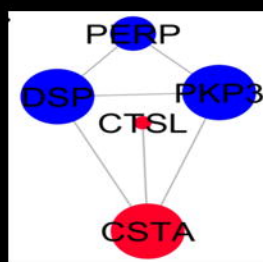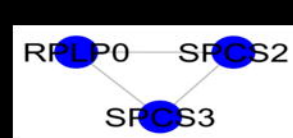

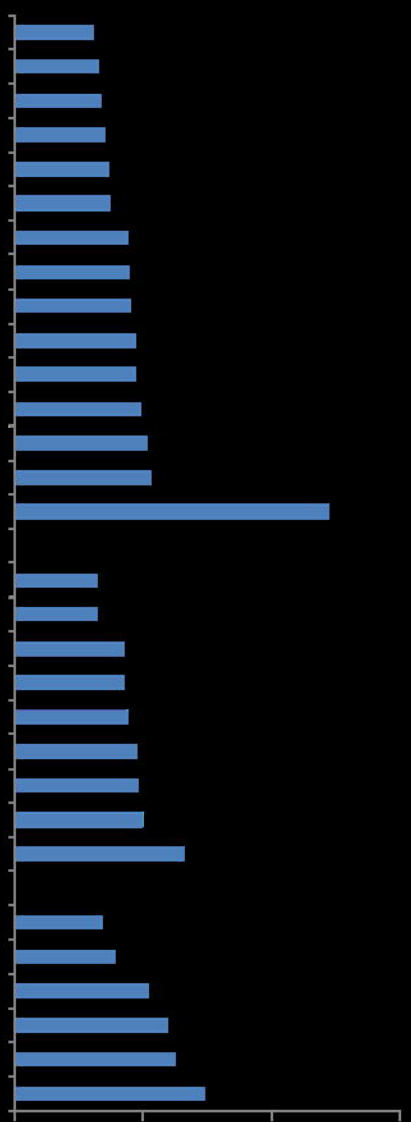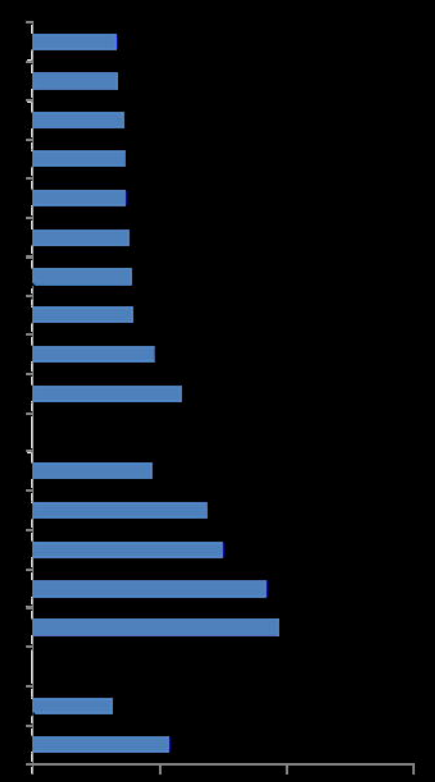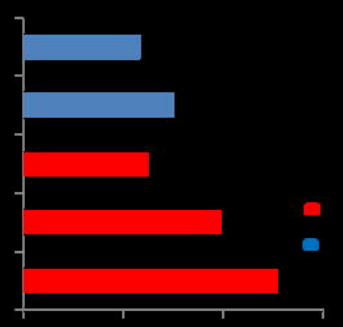

Source: https://medrxiv.org/content/10.1101/2024.02.09.24302561v1.full.pdf
